# Supplementary material
Source: PubMed Central journal article supplement (PMC2890848)
Supplement: 1001333107_pnas.201001333SI.pdf [file 1001333107_pnas.201001333SI.pdf]

# Supporting Information

Michelutti et al. 10.1073/pnas.1001333107

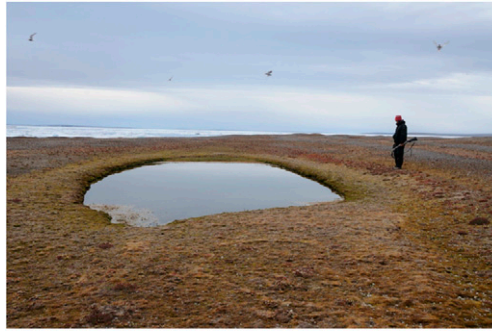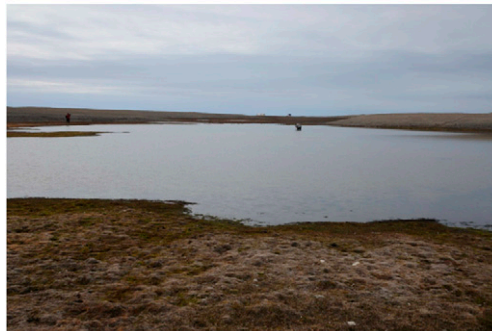

Fig. S1. Photographs of Tern Pond (*Upper*) and Eider Pond (*Lower*).

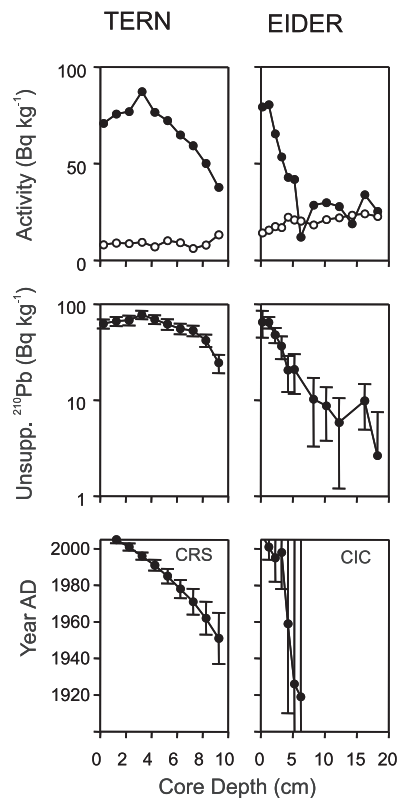

**Fig. S2.** Plots showing total and supported <sup>210</sup>Pb activity (as <sup>226</sup>Ra; *Upper*), unsupported <sup>210</sup>Pb activity (*Middle*), CRS- and CIC-derived age-depth profiles for Tern and Eider Ponds, respectively (*Bottom*). In Tern Pond, the profile of unsupported <sup>210</sup>Pb versus depth showed a nonmonotonic decline over time, necessitating the use of a CRS model to derive an age-depth profile. The <sup>137</sup>Cs profile (not shown) did not show a distinct subsurface peak likely because of Cs migration within the core, and thus could not be used to corroborate the CRS dates. The <sup>137</sup>Cs profile from the Eider Pond core (not shown) showed a distinct peak at 3.25 cm depth, denoting the year 1963, the time of its maximum atmospheric fallout from atomic weapons testing. The <sup>137</sup>Cs profile most closely matched <sup>210</sup>Pb dates derived from the CIC model, where 4 cm depth corresponded to the year 1967. Because the profile of unsupported <sup>210</sup>Pb versus depth did not show any major non-monotonic features before the supported/unsupported horizon at approximately 6 cm depth, the CIC model is permissible in this instance.



**Table S2. Geochemical data for the Tern Pond sediment core**

| Variable                   | Sediment core depth (cm) |        |        |        |        |        |        |        |        |        |
|----------------------------|--------------------------|--------|--------|--------|--------|--------|--------|--------|--------|--------|
|                            | 0.25                     | 1.25   | 2.25   | 3.25   | 4.25   | 5.25   | 6.25   | 7.25   | 8.25   | 9.25   |
| $\delta^{13}\text{C}$ , ‰* | -19.36                   | -19.05 | -19.08 | -18.60 | -22.65 | -22.28 | -21.52 | -19.26 | -19.47 | -19.58 |
| $\delta^{15}\text{N}$ , ‰* | 10.23                    | 10.23  | 10.22  | 10.15  | 10.24  | 10.16  | 10.11  | 10.21  | 10.21  | 10.12  |
| %C                         | 37.87                    | 47.67  | 28.83  | 50.38  | 30.09  | 30.94  | 30.93  | 48.22  | 47.16  | 41.26  |
| %N                         | 4.13                     | 4.05   | 4.19   | 4.00   | 4.19   | 3.49   | 3.04   | 3.78   | 2.87   | 2.03   |
| C/N, atomic                | 10.70                    | 13.73  | 8.03   | 14.69  | 8.38   | 10.33  | 11.87  | 14.88  | 19.17  | 23.71  |
| Hg, ng/g                   | 68.02                    | 64.70  | 64.86  | 68.66  | 72.33  | 69.84  | 70.54  | 75.17  | 70.82  | 56.48  |
| Ag, $\mu\text{g/g}$        | 0.25                     | 0.27   | 0.27   | 0.28   | 0.29   | 0.27   | 0.26   | 0.28   | 0.24   | 0.22   |
| As, $\mu\text{g/g}$        | 4.2                      | 3.2    | 3.4    | 3.4    | 2.3    | 2.5    | 3.1    | 2.8    | 2.7    | 2.6    |
| Be, $\mu\text{g/g}$        | 0.18                     | 0.18   | 0.19   | 0.18   | 0.18   | 0.20   | 0.20   | 0.23   | 0.21   | 0.18   |
| Cd, $\mu\text{g/g}$        | 4.6                      | 4.6    | 4.7    | 4.6    | 3.6    | 4.2    | 4.2    | 4.4    | 3.9    | 3.6    |
| Co, $\mu\text{g/g}$        | 1.6                      | 1.3    | 1.3    | 1.3    | 1.1    | 1.3    | 1.3    | 1.3    | 1.4    | 1.3    |
| Cr, $\mu\text{g/g}$        | 4.9                      | 4.4    | 4.4    | 4.3    | 2.7    | 4.0    | 3.8    | 3.9    | 4.0    | 3.3    |
| Se, $\mu\text{g/g}$        | 1.8                      | 1.9    | 2.2    | 2.1    | 1.6    | 1.7    | 2.2    | 1.6    | 1.1    | 1.5    |
| Sb, $\mu\text{g/g}$        | <0.1                     | <0.1   | <0.1   | <0.1   | <0.1   | <0.1   | <0.1   | <0.1   | <0.1   | <0.1   |
| Sn, $\mu\text{g/g}$        | <0.5                     | <0.5   | <0.5   | <0.5   | <0.5   | <0.5   | <0.5   | <0.5   | 0.7    | <0.5   |
| Te, $\mu\text{g/g}$        | <0.1                     | <0.1   | <0.1   | <0.1   | <0.1   | <0.1   | <0.1   | <0.1   | <0.1   | <0.1   |
| Tl, $\mu\text{g/g}$        | 0.10                     | 0.10   | 0.10   | 0.09   | 0.15   | 0.13   | 0.12   | 0.16   | 0.13   | 0.11   |
| V, $\mu\text{g/g}$         | 5                        | 5      | 5      | 5      | 4      | 5      | 5      | 5      | 5      | 5      |
| W, $\mu\text{g/g}$         | <0.04                    | <0.04  | <0.04  | <0.04  | <0.04  | <0.04  | <0.04  | <0.04  | <0.04  | <0.04  |
| Ba, $\mu\text{g/g}$        | 20                       | 18     | 18     | 18     | 15     | 16     | 16     | 17     | 15     | 14     |
| B, $\mu\text{g/g}$         | 25                       | 24     | 24     | 24     | 16     | 21     | 20     | 21     | 19     | 17     |
| Cu, $\mu\text{g/g}$        | 24                       | 24     | 25     | 24     | 19     | 22     | 22     | 23     | 21     | 19     |
| Mn, $\mu\text{g/g}$        | 95                       | 88     | 96     | 92     | 66     | 100    | 96     | 95     | 140    | 120    |
| Na, $\mu\text{g/g}$        | 440                      | 390    | 390    | 410    | 490    | 370    | 360    | 360    | 290    | 250    |
| Ni, $\mu\text{g/g}$        | 12                       | 12     | 12     | 11     | 9.2    | 10     | 10     | 10     | 9.9    | 8.8    |
| Sr, $\mu\text{g/g}$        | 142                      | 131    | 130    | 138    | 160    | 132    | 131    | 126    | 131    | 123    |
| Ti, $\mu\text{g/g}$        | 40                       | 36     | 38     | 36     | 26     | 35     | 35     | 35     | 38     | 32     |
| Zn, $\mu\text{g/g}$        | 100                      | 100    | 98     | 100    | 100    | 98     | 97     | 99     | 88     | 80     |
| Pb, $\mu\text{g/g}$        | 4.3                      | 4.1    | 3.9    | 3.7    | 2.9    | 3.6    | 3.4    | 3.6    | 3.6    | 3.2    |
| Al, $\mu\text{g/g}$        | 1,200                    | 1,100  | 1,100  | 1,200  | 1,200  | 1,200  | 1,200  | 1,200  | 1,400  | 1,200  |
| Ca, $\mu\text{g/g}$        | 68,000                   | 65,000 | 65,000 | 68,000 | 75,000 | 69,000 | 67,000 | 65,000 | 73,000 | 65,000 |
| Fe, $\mu\text{g/g}$        | 5,500                    | 5,500  | 5,600  | 5,800  | 5,700  | 6,200  | 6,000  | 6,200  | 6,500  | 5,800  |
| K, $\mu\text{g/g}$         | 4,700                    | 4,100  | 3,800  | 4,000  | 3,500  | 3,300  | 3,200  | 2,900  | 2,100  | 1,700  |
| Mg, $\mu\text{g/g}$        | 3,000                    | 2,900  | 2,800  | 3,000  | 2,900  | 3,000  | 2,800  | 2,800  | 3,000  | 2,700  |
| P, $\mu\text{g/g}$         | 6,400                    | 6,100  | 5,800  | 6,100  | 5,600  | 5,500  | 5,500  | 5,200  | 4,000  | 3,800  |

\*The data are reported in delta notation  $\delta$ ; the units are per mil (‰) and defined as  $d = ((R_x - R_{std}) / R_{std}) * 1,000$ , where R is the ratio of the abundance of the heavy to the light isotope, x denotes sample, and std is an abbreviation for standard. All  $\delta^{15}\text{N}$  is reported as ‰ vs. AIR and normalized to internal standards calibrated to International standards IAEA-N1(+0.4‰), IAEA-N2(+20.3‰), USGS-40(-4.52‰) and USGS-41(47.57‰). All  $\delta^{13}\text{C}$  is reported as ‰ vs. V-PDB and normalized to internal standards calibrated to International standards IAEA-CH-6(-10.4‰), NBS-22(-29.91‰), USGS-40(-26.24‰) and USGS-41(37.76‰). Please note that the PDB and V-PDB scales are identical and interchangeable.

**Table S3. Geochemical data for the Eider Pond sediment core**

| Variable                   | Sediment core depth (cm) |         |         |        |         |         |         |        |         |        |         |        |        |
|----------------------------|--------------------------|---------|---------|--------|---------|---------|---------|--------|---------|--------|---------|--------|--------|
|                            | 0.25                     | 1.25    | 2.25    | 3.25   | 4.25    | 5.25    | 6.25    | 8.25   | 10.25   | 12.25  | 14.25   | 16.25  | 18.25  |
| $\delta^{13}\text{C}$ , ‰* | -22.0                    | -22.4   | -22.7   | -22.8  | -22.6   | -22.1   | -21.5   | -20.9  | -20.7   | -21.2  | -21.9   | -20.8  | -21.1  |
| $\delta^{15}\text{N}$ , ‰* | 5.1                      | 5.0     | 5.0     | 4.6    | 4.9     | 4.8     | 5.3     | 5.5    | 5.2     | 7.2    | 5.6     | 5.0    | 5.4    |
| %C                         | 35.8                     | 34.9    | 31.5    | 30.8   | 26.7    | 31.6    | 28.5    | 23.3   | 9.3     | 4.7    | 3.5     | 4.4    | 3.7    |
| %N                         | 2.0                      | 2.1     | 2.0     | 1.8    | 1.7     | 1.6     | 1.5     | 1.1    | 0.5     | 0.3    | 0.2     | 0.2    | 0.2    |
| C/N, atomic                | 20.8                     | 19.6    | 18.9    | 19.7   | 18.5    | 22.9    | 22.0    | 25.4   | 22.0    | 16.4   | 20.5    | 24.2   | 20.8   |
| Hg, ng/g                   |                          | 38.6    | 43.0    | 45.3   | 45.1    | 48.4    | 37.7    | 29.7   | 18.1    | 13.8   | 12.0    | 13.9   | 13.8   |
| Ag, $\mu\text{g/g}$        | 0.05                     | 0.06    | 0.06    | 0.06   | 0.06    | 0.07    | 0.06    | 0.06   | 0.05    | 0.04   | 0.03    | 0.04   | 0.04   |
| As, $\mu\text{g/g}$        | 2.3                      | 2.2     | 2.5     | 3.2    | 3.5     | 3.3     | 3.1     | 3.2    | 7.4     | 5.6    | 6.2     | 6.3    | 8.6    |
| Be, $\mu\text{g/g}$        | 0.33                     | 0.36    | 0.39    | 0.54   | 0.47    | 0.49    | 0.38    | 0.4    | 0.65    | 0.76   | 0.76    | 0.78   | 0.7    |
| Cd, $\mu\text{g/g}$        | 0.58                     | 0.67    | 0.63    | 0.72   | 0.72    | 0.93    | 0.97    | 0.88   | 0.39    | 0.12   | 0.1     | 0.13   | 0.07   |
| Co, $\mu\text{g/g}$        | 3                        | 3.2     | 3.6     | 4.2    | 4.2     | 4.4     | 3.9     | 4      | 7.1     | 6.9    | 9       | 7.2    | 8      |
| Cr, $\mu\text{g/g}$        | 7.1                      | 7.2     | 7.7     | 9.7    | 8.9     | 9.2     | 7.4     | 7.4    | 11      | 13     | 13      | 13     | 12     |
| Se, $\mu\text{g/g}$        | 1                        | 1.4     | 1.2     | 1      | 1.1     | 0.8     | 1.3     | 0.8    | 0.7     | 0.7    | 0.7     | 0.7    | 0.7    |
| Sb, $\mu\text{g/g}$        | 0.1                      | 0.1     | 0.1     | 0.1    | 0.1     | 0.1     | 0.1     | 0.1    | 0.1     | 0.1    | 0.1     | 0.1    | 0.1    |
| Sn, $\mu\text{g/g}$        | 0.5                      | 0.5     | 0.5     | 0.5    | 0.5     | 0.5     | 0.5     | 0.5    | 0.5     | 0.5    | 0.5     | 0.5    | 0.5    |
| Te, $\mu\text{g/g}$        | 0.1                      | 0.1     | 0.1     | 0.1    | 0.1     | 0.1     | 0.1     | 0.1    | 0.1     | 0.1    | 0.1     | 0.1    | 0.1    |
| Tl, $\mu\text{g/g}$        | 0.09                     | 0.1     | 0.11    | 0.12   | 0.12    | 0.13    | 0.12    | 0.12   | 0.12    | 0.14   | 0.16    | 0.15   | 0.14   |
| V, $\mu\text{g/g}$         | 9                        | 9       | 10      | 13     | 12      | 12      | 10      | 10     | 12      | 14     | 14      | 13     | 13     |
| W, $\mu\text{g/g}$         | 0.04                     | 0.04    | 0.04    | 0.04   | 0.04    | 0.04    | 0.04    | 0.04   | 0.04    | 0.04   | 0.04    | 0.04   | 0.04   |
| Ba, $\mu\text{g/g}$        | 100                      | 70      | 62      | 68     | 65      | 66      | 61      | 57     | 44      | 35     | 30      | 32     | 32     |
| B, $\mu\text{g/g}$         | 26                       | 26      | 26      | 30     | 28      | 30      | 26      | 21     | 10      | 7      | 6       | 5      | 6      |
| Cu, $\mu\text{g/g}$        | 10                       | 13      | 12      | 14     | 14      | 15      | 13      | 12     | 16      | 18     | 17      | 18     | 17     |
| Mn, $\mu\text{g/g}$        | 160                      | 85      | 91      | 110    | 110     | 120     | 110     | 130    | 190     | 190    | 210     | 200    | 200    |
| Na, $\mu\text{g/g}$        | 330                      | 190     | 200     | 190    | 180     | 160     | 160     | 120    | 85      | 77     | 72      | 70     | 73     |
| Ni, $\mu\text{g/g}$        | 12                       | 13      | 13      | 16     | 15      | 16      | 13      | 13     | 21      | 21     | 22      | 18     | 22     |
| Sr, $\mu\text{g/g}$        | 99                       | 107     | 108     | 108    | 111     | 111     | 123     | 146    | 143     | 133    | 142     | 137    | 139    |
| Ti, $\mu\text{g/g}$        | 65                       | 69      | 68      | 75     | 71      | 64      | 57      | 59     | 58      | 66     | 71      | 65     | 69     |
| Zn, $\mu\text{g/g}$        | 63                       | 82      | 92      | 99     | 100     | 100     | 93      | 72     | 56      | 44     | 51      | 45     | 42     |
| Pb, $\mu\text{g/g}$        | 14                       | 16      | 18      | 21     | 21      | 22      | 18      | 14     | 14      | 14     | 13      | 26     | 14     |
| Al, $\mu\text{g/g}$        | 2,600                    | 3,300   | 3,700   | 3,900  | 4,100   | 3,700   | 3,300   | 3,200  | 4,700   | 5,800  | 5,700   | 5,600  | 5,700  |
| Ca, $\mu\text{g/g}$        | 87,000                   | 100,000 | 100,000 | 99,000 | 100,000 | 100,000 | 120,000 | 13,000 | 111,810 | 9,700  | 100,000 | 9,800  | 98,000 |
| Fe, $\mu\text{g/g}$        | 1,100                    | 11,000  | 14,000  | 16,000 | 19,000  | 21,000  | 22,000  | 22,000 | 19,000  | 20,000 | 22,000  | 22,000 | 22,000 |
| K, $\mu\text{g/g}$         | 2,200                    | 2,300   | 1,900   | 1,600  | 1,600   | 1,400   | 1,300   | 1,300  | 2,000   | 2,300  | 2,200   | 2,200  | 2,300  |
| Mg, $\mu\text{g/g}$        | 2,300                    | 2,800   | 3,000   | 3,100  | 3,100   | 3,000   | 2,800   | 3,200  | 4,800   | 5,400  | 5,600   | 5,300  | 5,400  |
| P, $\mu\text{g/g}$         | 1,700                    | 2,000   | 1,800   | 1,400  | 1,200   | 980     | 850     | 760    | 680     | 930    | 840     | 780    | 760    |

\*The data are reported in Delta notation  $\delta$ , the units are per mil (‰) and defined as  $d = ((R_x - R_{std}) / R_{std}) * 1,000$  where R is the ratio of the abundance of the heavy to the light isotope, x denotes sample and std is an abbreviation for standard. All  $\delta^{15}\text{N}$  is reported as ‰ vs. AIR and normalized to internal standards calibrated to International standards IAEA-N1(+0.4‰), IAEA-N2(+20.3‰), USGS-40(-4.52‰) and USGS-41(47.57‰). All  $\delta^{13}\text{C}$  is reported as ‰ vs. V-PDB and normalized to internal standards calibrated to International standards IAEA-CH-6(-10.4‰), NBS-22(-29.91‰), USGS-40(-26.24‰) and USGS-41(37.76‰). Please note that the PDB and V-PDB scales are identical and interchangeable.
